# Supplementary material for: Feeding Rainbow Trout with Different Types of Non-Starch Polysaccharides: Impacts on Serum Metabolome and Gut Microbiota
Source: MDPI journal article supplement (doi:10.3390/metabo12121167), 2022-11-23
Supplement: s1 [file s1]

**Supplementary Table S1:** Diets formulation and nutrient composition used in this trial.

|                                                  | FM    | INSP  | NSP   | NSPs  |
|--------------------------------------------------|-------|-------|-------|-------|
| <b><i>Ingredients</i></b>                        |       |       |       |       |
| Fish meal <sup>1</sup>                           | 59.00 | 59.00 | 59.00 | 59.00 |
| Wheat flour                                      | 2.75  | 2.75  | 2.75  | 2.75  |
| $\alpha$ -starch                                 | 24.80 | 16.80 | 8.00  | 0.00  |
| Cellulose                                        | –     | 8.00  | –     | 8.00  |
| Water soluble NSP <sup>2</sup>                   | –     | –     | 16.80 | 16.80 |
| Soybean oil                                      | 10.60 | 10.60 | 10.60 | 10.60 |
| Soybean lecithin                                 | 0.50  | 0.50  | 0.50  | 0.50  |
| Ca(H <sub>2</sub> PO <sub>4</sub> ) <sub>2</sub> | 1.00  | 1.00  | 1.00  | 1.00  |
| Choline chloride (50%) <sup>1</sup>              | 0.30  | 0.30  | 0.30  | 0.30  |
| Ethoxyquin (30%) <sup>1</sup>                    | 0.03  | 0.03  | 0.03  | 0.03  |
| Vitamin C <sup>3</sup>                           | 0.02  | 0.02  | 0.02  | 0.02  |
| Mineral premix <sup>4</sup>                      | 0.60  | 0.60  | 0.60  | 0.60  |
| Vitamin premix <sup>5</sup>                      | 0.40  | 0.40  | 0.40  | 0.40  |
| <b><i>Nutrient composition</i></b>               |       |       |       |       |
| Dry matter (DM, %)                               | 90.55 | 90.86 | 93.70 | 93.84 |
| Crude protein (% DM)                             | 42.26 | 42.69 | 41.95 | 42.37 |
| Crude lipid (% DM)                               | 17.12 | 17.40 | 17.10 | 17.35 |
| Ash (% DM)                                       | 12.43 | 12.16 | 12.02 | 11.76 |
| Gross energy (kJ/g DM)                           | 21.21 | 21.74 | 21.73 | 22.02 |
| Viscosity (cP)                                   | 70.00 | 37.50 | 24.00 | 16.00 |

<sup>1</sup>Supplied by Kunming Tianyuan Feed Co., Ltd. (Yunnan, China); fish meal, 66.3% crude protein, 15.8% crude lipid.

<sup>2</sup>SNSP (soluble non-starch polysaccharides) including 4.8% araboxylan, 1.12%  $\beta$ -glucan, 1.28% mannosan, 9.60% pectin.

<sup>3</sup>L-Ascorbate-2-polyphosphate (35%), supplied by Galaxy Chemicals Co., Ltd. (Hubei, China).

<sup>4</sup>Vitamin premix (g/kg mixture): retinyl acetate (2800000 IU/g), 2; cholecalciferol, 0.03; DL- $\alpha$ -tocopheryl acetate, 30; menadione, 3; thiamine hydrochloride, 8; riboflavin, 11; pyridoxine hydrochloride, 8; vitamin B<sub>12</sub>, 0.02; ascorbic acid, 50; folic acid, 1; biotin, 0.1; niacin, 30; calcium D-pantothenate, 32; inositol, 25.

<sup>5</sup>Mineral premix (g/kg mixture): MgSO<sub>4</sub>•7H<sub>2</sub>O, 180; KI, 1; FeSO<sub>4</sub>•H<sub>2</sub>O, 260; ZnSO<sub>4</sub>•H<sub>2</sub>O, 180; CuSO<sub>4</sub>•5H<sub>2</sub>O, 25; Na<sub>2</sub>Se<sub>2</sub>O<sub>3</sub>, 0.01; MnSO<sub>4</sub>•H<sub>2</sub>O, 180; CoCl<sub>2</sub>•6H<sub>2</sub>O, 0.75.

**Supplementary Table S2:** Differential metabolites between FM and INSP groups.

| No.                       | VIP  | Name                                                | Molecular Weight | RT [min] | Fold INSP/FM | T test |
|---------------------------|------|-----------------------------------------------------|------------------|----------|--------------|--------|
| <b>Positive ion model</b> |      |                                                     |                  |          |              |        |
| 1                         | 1.75 | L-Proline                                           | 115.0630         | 0.89     | 0.91         | 0.007  |
| 2                         | 1.48 | L-Pyroglutamic acid                                 | 129.0421         | 1.20     | 0.42         | 0.027  |
| 3                         | 1.90 | Vigabatrin                                          | 129.0785         | 0.78     | 0.61         | 0.003  |
| 4                         | 1.83 | L- (+)-Leucine                                      | 131.0941         | 1.42     | 0.38         | 0.004  |
| 5                         | 1.86 | DL-Lysine                                           | 146.1050         | 0.78     | 0.59         | 0.004  |
| 6                         | 1.64 | L- (-)-methionine                                   | 149.0505         | 1.12     | 0.51         | 0.013  |
| 8                         | 1.91 | Xanthine                                            | 152.0328         | 1.19     | -0.64        | 0.003  |
| 9                         | 1.41 | (E)-p-coumaric acid                                 | 164.0469         | 1.21     | 0.40         | 0.036  |
| 10                        | 1.41 | DL-TYROSINE                                         | 181.0734         | 1.21     | 0.39         | 0.037  |
| 11                        | 1.75 | Zalcitabine                                         | 211.0949         | 1.32     | 0.72         | 0.007  |
| 12                        | 1.35 | 2-Amino-9-pentofuranosyl-1,9-dihydro-6H-purin-6-one | 283.0910         | 1.22     | -0.40        | 0.046  |
| 13                        | 1.63 | Androstane-3,16-diol                                | 292.2393         | 10.96    | -0.70        | 0.013  |
| 14                        | 1.55 | 13-KODE                                             | 294.2186         | 9.07     | 0.81         | 0.020  |
| 15                        | 1.75 | 8-(2-Octyl-1-cyclopropen-1-yl) octanoic acid        | 294.2548         | 11.80    | -0.78        | 0.007  |
| 16                        | 1.49 | DErySphinganine                                     | 301.2975         | 6.56     | -0.29        | 0.025  |
| 17                        | 1.61 | 5,6-Dihydroretinoic acid                            | 302.2237         | 9.19     | 0.38         | 0.015  |
| 18                        | 1.59 | Fructoselysine                                      | 308.1574         | 0.77     | 0.36         | 0.016  |
| 19                        | 1.86 | Pregnane-3,20-dione                                 | 316.2391         | 10.69    | 0.52         | 0.004  |
| 20                        | 2.05 | loganate                                            | 376.1366         | 3.63     | -0.45        | 0.001  |
| <b>Negative ion model</b> |      |                                                     |                  |          |              |        |
| 1                         | 1.87 | Gamma-Hydroxybutyric acid                           | 104.0471         | 1.60     | 0.66         | 0.002  |
| 2                         | 1.41 | Ethyl lactate                                       | 118.0627         | 3.24     | 0.88         | 0.027  |
| 3                         | 1.93 | L- (-)-Threonine                                    | 119.0581         | 0.85     | 0.88         | 0.001  |
| 4                         | 1.30 | L-Pyroglutamic acid                                 | 129.0423         | 1.21     | 0.33         | 0.044  |
| 5                         | 1.75 | (Hydroxyethyl)methacrylate                          | 130.0627         | 3.76     | 0.51         | 0.004  |
| 6                         | 1.27 | L- (+)-Leucine                                      | 131.0943         | 1.42     | 0.33         | 0.049  |
| 7                         | 1.73 | DL-Lysine                                           | 146.1052         | 0.84     | 0.68         | 0.005  |
| 8                         | 1.46 | Ethyl 3-oxohexanoate                                | 158.0939         | 4.43     | 0.50         | 0.021  |
| 9                         | 1.41 | 2-Hydroxyoctanoic acid                              | 160.1095         | 4.78     | 0.66         | 0.027  |
| 10                        | 1.63 | Pentonic acid                                       | 166.0473         | 0.87     | -1.26        | 0.008  |
| 11                        | 1.31 | Uric Acid                                           | 168.0280         | 0.91     | 0.53         | 0.042  |
| 12                        | 1.58 | 1,3,4-Trihydroxy-5-oxocyclohexanecarboxylic acid    | 190.0471         | 0.93     | -0.49        | 0.011  |
| 13                        | 1.91 | Metirosine                                          | 195.0889         | 6.50     | -0.21        | 0.001  |
| 14                        | 1.47 | DL-Tryptophan                                       | 204.0891         | 3.35     | 0.40         | 0.020  |
| 15                        | 1.62 | 5,6-Dihydroretinoic acid                            | 302.2233         | 9.19     | 0.31         | 0.009  |

**Supplementary Table S3: Differential metabolites between FM and SNSP groups.**

| No.                       | VIP  | Name                                                                                                          | Molecular Weight | RT [min] | Fold INSP/FM | T test |
|---------------------------|------|---------------------------------------------------------------------------------------------------------------|------------------|----------|--------------|--------|
| <b>Positive ion model</b> |      |                                                                                                               |                  |          |              |        |
| 1                         | 1.39 | Trimethylamine N-oxide                                                                                        | 75.0681          | 0.88     | 1.77         | 0.000  |
| 2                         | 1.10 | Piperidine                                                                                                    | 85.0888          | 1.35     | 0.88         | 0.005  |
| 3                         | 1.17 | N-Methylpyrrolidone                                                                                           | 99.0680          | 2.11     | 0.51         | 0.002  |
| 4                         | 1.74 | Indole                                                                                                        | 117.0575         | 3.41     | 1.05         | 0.000  |
| 5                         | 1.36 | L-(+)-Valine                                                                                                  | 117.0785         | 0.89     | 0.90         | 0.000  |
| 6                         | 1.18 | Nicotinamide                                                                                                  | 122.0476         | 1.19     | 0.53         | 0.002  |
| 7                         | 1.40 | Vigabatrin                                                                                                    | 129.0785         | 0.78     | 0.93         | 0.000  |
| 8                         | 1.02 | CREATINE                                                                                                      | 131.0691         | 0.89     | 1.65         | 0.011  |
| 9                         | 1.64 | L-(+)-Leucine                                                                                                 | 131.0941         | 1.42     | 0.84         | 0.000  |
| 10                        | 1.51 | Naphthalen-2-amine                                                                                            | 143.0731         | 3.36     | 0.79         | 0.000  |
| 11                        | 1.43 | DL-Lysine                                                                                                     | 146.1050         | 0.78     | 0.96         | 0.000  |
| 12                        | 1.32 | L-(-)-methionine                                                                                              | 149.0505         | 1.12     | 0.94         | 0.000  |
| 13                        | 1.30 | (E)-p-coumaric acid                                                                                           | 164.0469         | 1.21     | 0.81         | 0.000  |
| 14                        | 1.34 | DL-Phenylalanine                                                                                              | 165.0784         | 2.01     | 0.66         | 0.000  |
| 15                        | 1.32 | DL-TYROSINE                                                                                                   | 181.0734         | 1.21     | 0.83         | 0.000  |
| 16                        | 1.30 | 4-amino-2-hydroxyamino-6-nitrotoluene                                                                         | 183.0644         | 7.97     | -2.81        | 0.000  |
| 17                        | 1.17 | DL-Tryptophan                                                                                                 | 204.0893         | 3.33     | 0.42         | 0.002  |
| 18                        | 1.32 | Sinapyl alcohol                                                                                               | 210.0890         | 3.88     | 2.15         | 0.000  |
| 19                        | 1.14 | primidone                                                                                                     | 218.1048         | 3.76     | 1.03         | 0.003  |
| 20                        | 1.10 | 3-(1H-Imidazol-4-yl)-2-oxopropyl dihydrogen phosphate                                                         | 220.0251         | 17.16    | 0.76         | 0.005  |
| 21                        | 1.40 | threonylphenylalanine                                                                                         | 266.1257         | 4.00     | 3.39         | 0.000  |
| 22                        | 1.37 | Androstane-3,16-diol                                                                                          | 292.2393         | 11.03    | -1.43        | 0.000  |
| 23                        | 1.50 | 13-KODE                                                                                                       | 294.2186         | 9.07     | 1.27         | 0.000  |
| 24                        | 1.24 | 8-(2-Octyl-1-cyclopropen-1-yl) octanoic acid                                                                  | 294.2548         | 11.80    | -1.11        | 0.001  |
| 25                        | 1.30 | 2-aminooctadec-4-ene-1,3-diol                                                                                 | 299.2817         | 6.96     | 2.22         | 0.000  |
| 26                        | 1.49 | DErySphinganine                                                                                               | 301.2974         | 6.61     | 1.08         | 0.000  |
| 27                        | 1.34 | 5,6-Dihydroretinoic acid                                                                                      | 302.2237         | 9.19     | -0.79        | 0.000  |
| 28                        | 1.14 | Fructoselysine                                                                                                | 308.1574         | 0.77     | -0.44        | 0.003  |
| 29                        | 1.18 | Pregnane-3,20-dione                                                                                           | 316.2391         | 10.69    | -0.60        | 0.002  |
| 30                        | 1.46 | Phytosphingosine                                                                                              | 317.2921         | 5.65     | -0.62        | 0.000  |
| 31                        | 1.37 | Allopregnanolone                                                                                              | 318.2548         | 11.29    | -1.49        | 0.000  |
| 32                        | 1.50 | Adipostatin A                                                                                                 | 320.2705         | 12.09    | -1.91        | 0.000  |
| 33                        | 1.61 | Retinyl acetate                                                                                               | 328.2392         | 9.62     | -1.12        | 0.000  |
| 34                        | 1.48 | (2R)-2-Hydroxy-3-[(6Z,9Z,12Z,15Z)-6,9,12,15-octadecatetraenoyloxy] propyl 2-(trimethylammonio)ethyl phosphate | 515.2990         | 6.61     | -0.73        | 0.000  |
| <b>Negative ion model</b> |      |                                                                                                               |                  |          |              |        |
| 1                         | 1.24 | Gamma-Hydroxybutyric acid                                                                                     | 104.0471         | 1.60     | 0.79         | 0.005  |
| 2                         | 1.32 | Ethyl lactate                                                                                                 | 118.0627         | 3.24     | 1.90         | 0.002  |
| 3                         | 1.63 | L-(-)-Threonine                                                                                               | 119.0581         | 0.85     | 1.14         | 0.000  |
| 4                         | 1.29 | L-Pyroglutamic acid                                                                                           | 129.0423         | 1.21     | 0.56         | 0.003  |
| 5                         | 1.21 | (Hydroxyethyl)methacrylate                                                                                    | 130.0627         | 3.76     | 0.85         | 0.006  |
| 6                         | 1.73 | L-(+)-Leucine                                                                                                 | 131.0943         | 1.42     | 0.89         | 0.000  |
| 7                         | 1.70 | 2,3,4-Trihydroxybutanoic acid                                                                                 | 136.0369         | 0.88     | 1.60         | 0.000  |
| 8                         | 1.76 | DL-Lysine                                                                                                     | 146.1052         | 0.84     | 2.17         | 0.000  |
| 9                         | 1.02 | 2,4-Dideoxy-3-C-methylpentonic acid                                                                           | 148.0732         | 1.30     | 0.62         | 0.025  |
| 10                        | 1.91 | 2,3,4,5-Tetrahydroxypentanal                                                                                  | 150.0525         | 0.90     | 4.22         | 0.000  |
| 11                        | 1.94 | pentane-1,2,3,4,5-pentol                                                                                      | 152.0682         | 0.85     | 5.01         | 0.000  |
| 12                        | 1.05 | DL-Histidine                                                                                                  | 155.0691         | 0.85     | 0.36         | 0.021  |
| 13                        | 1.11 | DL-Phenylalanine                                                                                              | 165.0785         | 2.01     | 0.49         | 0.013  |
| 14                        | 1.98 | Pentonic acid                                                                                                 | 166.0473         | 0.87     | 6.18         | 0.000  |
| 15                        | 1.08 | veratraldehyde                                                                                                | 166.0625         | 3.99     | 1.19         | 0.016  |
| 16                        | 1.15 | Uric Acid                                                                                                     | 168.0278         | 1.17     | 0.89         | 0.010  |
| 17                        | 1.02 | Vitamin C                                                                                                     | 176.0316         | 0.91     | 4.24         | 0.024  |
| 18                        | 1.08 | Hexose                                                                                                        | 180.0629         | 0.90     | 1.22         | 0.017  |
| 19                        | 1.50 | Hexitol                                                                                                       | 182.0785         | 0.84     | 5.42         | 0.000  |
| 20                        | 1.40 | DL-Tryptophan                                                                                                 | 204.0891         | 3.35     | 0.62         | 0.001  |
| 21                        | 1.20 | 5,6-Dihydroretinoic acid                                                                                      | 302.2233         | 9.19     | -0.38        | 0.007  |
| 22                        | 1.84 | Melilotoside                                                                                                  | 326.1007         | 0.88     | 7.07         | 0.000  |
| 23                        | 1.79 | Chlorogenic acid                                                                                              | 354.0954         | 0.88     | 5.66         | 0.000  |
| 24                        | 1.68 | Gentiopicroside                                                                                               | 356.1109         | 0.88     | 5.75         | 0.000  |

**Supplementary Table S4:** Differential metabolites between FM and NSP groups.

| No.                       | VIP  | Name                                                  | Molecular Weight | RT [min] | Fold INSP/FM | T test |
|---------------------------|------|-------------------------------------------------------|------------------|----------|--------------|--------|
| <b>Positive ion model</b> |      |                                                       |                  |          |              |        |
| 1                         | 1.25 | Trimethylamine N-oxide                                | 75.0681          | 0.88     | 1.28         | 0.026  |
| 2                         | 1.36 | Indole                                                | 117.0575         | 3.41     | 0.25         | 0.014  |
| 3                         | 1.33 | Nicotinamide                                          | 122.0476         | 1.19     | 0.44         | 0.017  |
| 4                         | 1.50 | L-Pyroglutamic acid                                   | 129.0421         | 1.20     | 0.44         | 0.005  |
| 5                         | 1.84 | Vigabatrin                                            | 129.0785         | 0.78     | 0.84         | 0.000  |
| 6                         | 1.80 | L-(+)-Leucine                                         | 131.0941         | 1.42     | 0.58         | 0.000  |
| 7                         | 1.23 | Naphthalen-2-amine                                    | 143.0731         | 3.36     | 0.35         | 0.029  |
| 8                         | 1.82 | DL-Lysine                                             | 146.1050         | 0.78     | 0.85         | 0.000  |
| 9                         | 1.21 | L-(-)-methionine                                      | 149.0506         | 1.19     | 0.47         | 0.032  |
| 10                        | 1.31 | Guanine                                               | 151.0489         | 1.22     | -0.65        | 0.019  |
| 11                        | 1.52 | Xanthine                                              | 152.0328         | 1.19     | -0.69        | 0.005  |
| 12                        | 1.33 | (E)-p-coumaric acid                                   | 164.0469         | 1.21     | 0.55         | 0.017  |
| 13                        | 1.26 | Uric Acid                                             | 168.0278         | 1.17     | 0.94         | 0.025  |
| 14                        | 1.40 | DL-Arginine                                           | 174.1112         | 0.86     | 0.61         | 0.011  |
| 15                        | 1.34 | DL-TYROSINE                                           | 181.0734         | 1.21     | 0.55         | 0.016  |
| 16                        | 1.48 | Sinapyl alcohol                                       | 210.0890         | 3.88     | 1.09         | 0.007  |
| 17                        | 1.17 | primidone                                             | 218.1048         | 3.76     | 0.72         | 0.039  |
| 18                        | 1.45 | 3-(1H-Imidazol-4-yl)-2-oxopropyl dihydrogen phosphate | 220.0249         | 17.38    | 0.78         | 0.008  |
| 19                        | 1.57 | threonylphenylalanine                                 | 266.1257         | 4.00     | 3.42         | 0.003  |
| 20                        | 1.23 | Arabinosylhypoxanthine                                | 268.0801         | 1.22     | 0.28         | 0.029  |
| 21                        | 1.42 | 2-Amino-9-pentofuranosyl-1,9-dihydro-6H-purin-6-one   | 283.0910         | 1.22     | -0.72        | 0.010  |
| 22                        | 1.93 | 13-KODE                                               | 294.2186         | 9.07     | 1.43         | 0.000  |
| 23                        | 1.18 | 2-aminooctadec-4-ene-1,3-diol                         | 299.2817         | 6.96     | 0.42         | 0.038  |
| 24                        | 1.34 | Fructoselysine                                        | 308.1574         | 0.77     | -0.39        | 0.016  |
| 25                        | 1.33 | Adipostatin A                                         | 320.2705         | 12.09    | -0.95        | 0.017  |
| 26                        | 1.21 | L-Palmitoylcarnitine                                  | 399.3333         | 7.74     | 1.61         | 0.032  |
| <b>Negative ion model</b> |      |                                                       |                  |          |              |        |
| 1                         | 1.94 | Gamma-Hydroxybutyric acid                             | 104.0471         | 1.60     | 0.87         | 0.000  |
| 2                         | 1.21 | Succinic acid                                         | 118.0264         | 1.30     | 0.68         | 0.029  |
| 3                         | 1.66 | Ethyl lactate                                         | 118.0627         | 3.24     | 1.54         | 0.001  |
| 4                         | 1.92 | L-(-)-Threonine                                       | 119.0581         | 0.85     | 1.45         | 0.000  |
| 5                         | 1.66 | L-Pyroglutamic acid                                   | 129.0423         | 1.21     | 0.47         | 0.001  |
| 6                         | 2.06 | (Hydroxyethyl)methacrylate                            | 130.0627         | 3.76     | 1.11         | 0.000  |
| 7                         | 2.10 | L-(+)-Leucine                                         | 131.0943         | 1.42     | 0.82         | 0.000  |
| 8                         | 2.15 | 2,3,4-Trihydroxybutanoic acid                         | 136.0369         | 0.88     | 1.44         | 0.000  |
| 9                         | 1.27 | Hypoxanthine                                          | 136.0383         | 1.22     | 0.31         | 0.021  |
| 10                        | 1.88 | DL-Lysine                                             | 146.1052         | 0.84     | 1.94         | 0.000  |
| 11                        | 2.27 | 2,3,4,5-Tetrahydroxypentanal                          | 150.0525         | 0.90     | 3.91         | 0.000  |
| 12                        | 2.33 | pentane-1,2,3,4,5-pentol                              | 152.0682         | 0.85     | 4.93         | 0.000  |
| 13                        | 1.30 | 2-Hydroxyoctanoic acid                                | 160.1095         | 4.78     | 0.62         | 0.018  |
| 14                        | 2.31 | Pentonic acid                                         | 166.0473         | 0.87     | 6.32         | 0.000  |
| 15                        | 1.14 | veratraldehyde                                        | 166.0625         | 3.99     | 0.77         | 0.043  |
| 16                        | 1.42 | Uric Acid                                             | 168.0278         | 1.17     | 1.09         | 0.009  |
| 17                        | 1.25 | Hexose                                                | 180.0629         | 0.90     | 0.74         | 0.024  |
| 18                        | 1.76 | Hexitol                                               | 182.0785         | 0.84     | 4.29         | 0.000  |
| 19                        | 1.17 | DL-Tryptophan                                         | 204.0891         | 3.35     | 0.39         | 0.036  |
| 20                        | 1.60 | 2-(Hexopyranosyloxy)-3-hydroxypropanoic acid          | 268.0797         | 1.23     | 0.40         | 0.002  |
| 21                        | 1.47 | Melilotoside                                          | 326.1007         | 0.88     | 6.28         | 0.006  |
| 22                        | 1.49 | Retinyl acetate                                       | 328.2389         | 7.44     | 0.29         | 0.005  |
| 23                        | 1.53 | Chlorogenic acid                                      | 354.0954         | 0.88     | 5.00         | 0.004  |
| 24                        | 1.37 | Gentiopicroside                                       | 356.1109         | 0.88     | 4.17         | 0.012  |

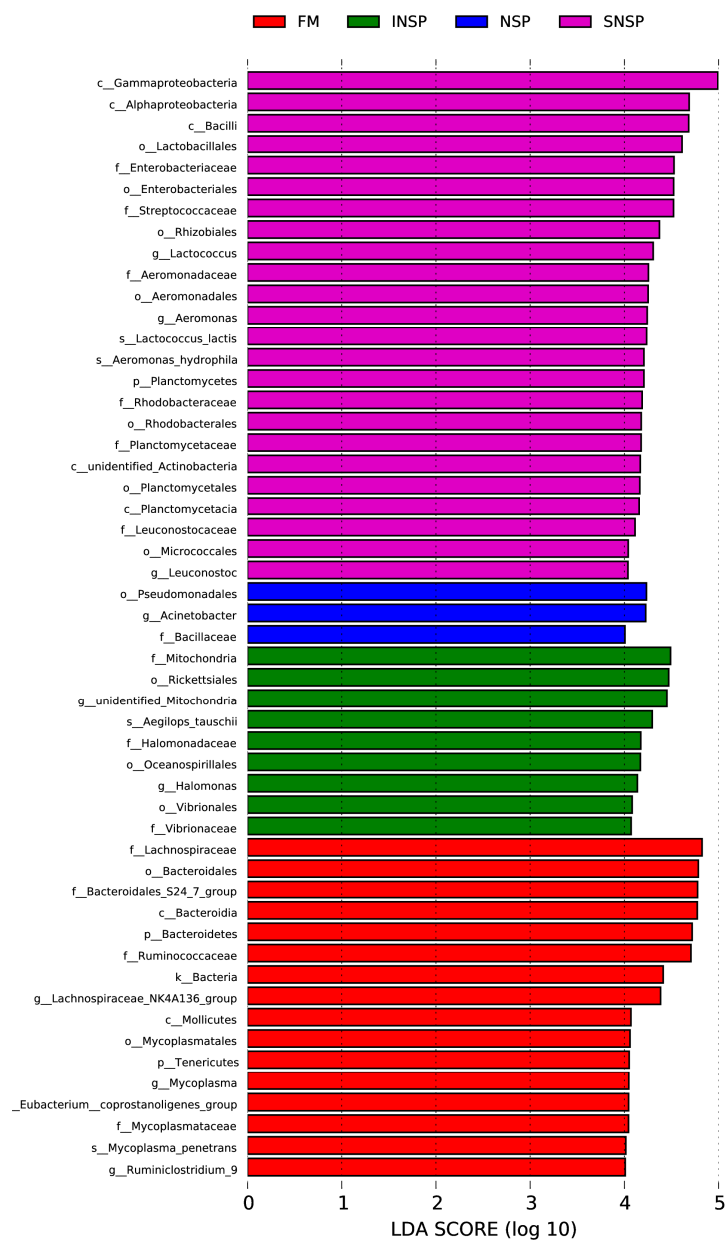

**Supplementary Figure S1:** LEfSe analysis of microbiota in grass carp fed by test feeds.
